# Supplementary material for: The role of state feelings of loneliness in the situational regulation of social affiliative behavior: Exploring the regulatory relations within a multilevel framework
Source: PubMed Central journal article supplement (PMC8205143; doi:10.1371/journal.pone.0252775), 2021-06-15
Supplement: pone.0252775.s001.pdf [file pone.0252775.s001.pdf]

## The Mixed Procedure

| Model Information         |                             |
|---------------------------|-----------------------------|
| Data Set                  | CONSTUDY.PLOS_ONE           |
| Dependent Variable        | CON                         |
| Covariance Structures     | Unstructured, Spatial Power |
| Subject Effects           | ID, ID                      |
| Estimation Method         | ML                          |
| Residual Variance Method  | Profile                     |
| Fixed Effects SE Method   | Kenward-Roger               |
| Degrees of Freedom Method | Kenward-Roger               |

| Dimensions               |    |
|--------------------------|----|
| Covariance Parameters    | 3  |
| Columns in X             | 1  |
| Columns in Z per Subject | 1  |
| Subjects                 | 65 |
| Max Obs per Subject      | 61 |

| Number of Observations          |      |
|---------------------------------|------|
| Number of Observations Read     | 3341 |
| Number of Observations Used     | 3341 |
| Number of Observations Not Used | 0    |

| Iteration History |             |                |            |
|-------------------|-------------|----------------|------------|
| Iteration         | Evaluations | -2 Log Like    | Criterion  |
| 0                 | 1           | 33391.64164868 |            |
| 1                 | 3           | 32861.13562328 | 0.01207168 |
| 2                 | 2           | 32702.95847185 | 0.00417967 |
| 3                 | 1           | 32639.37639239 | 0.00030441 |
| 4                 | 1           | 32635.10973807 | 0.00000295 |
| 5                 | 1           | 32635.07015725 | 0.00000000 |

Convergence criteria met.

| Covariance Parameter Estimates |         |          |                |         |        |       |         |         |
|--------------------------------|---------|----------|----------------|---------|--------|-------|---------|---------|
| Cov Parm                       | Subject | Estimate | Standard Error | Z Value | Pr Z   | Alpha | Lower   | Upper   |
| UN(1,1)                        | ID      | 145.02   | 32.0988        | 4.52    | <.0001 | 0.05  | 98.1016 | 236.08  |
| SP(POW)                        | ID      | 0.6432   | 0.01416        | 45.43   | <.0001 | 0.05  | 0.6154  | 0.6709  |
| Residual                       |         | 1136.71  | 31.9869        | 35.54   | <.0001 | 0.05  | 1076.54 | 1202.11 |

| Fit Statistics           |         |
|--------------------------|---------|
| -2 Log Likelihood        | 32635.1 |
| AIC (Smaller is Better)  | 32643.1 |
| AICC (Smaller is Better) | 32643.1 |
| BIC (Smaller is Better)  | 32651.8 |

| Null Model Likelihood Ratio Test |            |            |
|----------------------------------|------------|------------|
| DF                               | Chi-Square | Pr > ChiSq |
| 2                                | 756.57     | <.0001     |

| Solution for Fixed Effects |          |                |    |         |         |       |       |       |
|----------------------------|----------|----------------|----|---------|---------|-------|-------|-------|
| Effect                     | Estimate | Standard Error | DF | t Value | Pr >  t | Alpha | Lower | Upper |

| Solution for Fixed Effects |          |                |      |         |         |       |         |         |
|----------------------------|----------|----------------|------|---------|---------|-------|---------|---------|
| Effect                     | Estimate | Standard Error | DF   | t Value | Pr >  t | Alpha | Lower   | Upper   |
| Intercept                  | 57.8259  | 1.6773         | 65.1 | 34.48   | <.0001  | 0.05  | 54.4762 | 61.1755 |

The Mixed Procedure

Model Step 2 - ML

| Model Information         |                             |
|---------------------------|-----------------------------|
| Data Set                  | CONSTUDY.PLOS_ONE           |
| Dependent Variable        | CON                         |
| Covariance Structures     | Unstructured, Spatial Power |
| Subject Effects           | ID, ID                      |
| Estimation Method         | ML                          |
| Residual Variance Method  | Profile                     |
| Fixed Effects SE Method   | Kenward-Roger               |
| Degrees of Freedom Method | Kenward-Roger               |

| Dimensions               |    |
|--------------------------|----|
| Covariance Parameters    | 3  |
| Columns in X             | 12 |
| Columns in Z per Subject | 1  |
| Subjects                 | 65 |
| Max Obs per Subject      | 61 |

| Number of Observations          |      |
|---------------------------------|------|
| Number of Observations Read     | 3341 |
| Number of Observations Used     | 3341 |
| Number of Observations Not Used | 0    |

| Iteration History |             |                |            |
|-------------------|-------------|----------------|------------|
| Iteration         | Evaluations | -2 Log Like    | Criterion  |
| 0                 | 1           | 32476.37318011 |            |
| 1                 | 2           | 32737.40406071 | 0.01176134 |
| 2                 | 2           | 32549.26068218 | 0.00709221 |
| 3                 | 1           | 32428.45268789 | 0.00320766 |
| 4                 | 2           | 32376.61810972 | 0.00068718 |
| 5                 | 2           | 32366.20485608 | 0.00006553 |
| 6                 | 1           | 32365.25954176 | 0.00000207 |
| 7                 | 1           | 32365.23161551 | 0.00000000 |

Convergence criteria met.

| Covariance Parameter Estimates |         |          |                |         |        |       |         |        |
|--------------------------------|---------|----------|----------------|---------|--------|-------|---------|--------|
| Cov Parm                       | Subject | Estimate | Standard Error | Z Value | Pr Z   | Alpha | Lower   | Upper  |
| UN(1,1)                        | ID      | 69.5340  | 16.3513        | 4.25    | <.0001 | 0.05  | 46.0232 | 117.16 |
| SP(POW)                        | ID      | 0.2167   | 0.06441        | 3.36    | 0.0008 | 0.05  | 0.09042 | 0.3429 |
| Residual                       |         | 918.43   | 22.8257        | 40.24   | <.0001 | 0.05  | 875.28  | 964.86 |

| Fit Statistics           |         |
|--------------------------|---------|
| -2 Log Likelihood        | 32365.2 |
| AIC (Smaller is Better)  | 32395.2 |
| AICC (Smaller is Better) | 32395.4 |
| BIC (Smaller is Better)  | 32427.8 |

| Null Model Likelihood Ratio Test |            |            |
|----------------------------------|------------|------------|
| DF                               | Chi-Square | Pr > ChiSq |
| 2                                | 111.14     | <.0001     |

| Solution for Fixed Effects |          |                |      |         |         |       |          |          |
|----------------------------|----------|----------------|------|---------|---------|-------|----------|----------|
| Effect                     | Estimate | Standard Error | DF   | t Value | Pr >  t | Alpha | Lower    | Upper    |
| Intercept                  | 41.6747  | 1.9455         | 362  | 21.42   | <.0001  | 0.05  | 37.8489  | 45.5006  |
| tp                         | -0.01398 | 0.03594        | 914  | -0.39   | 0.6975  | 0.05  | -0.08451 | 0.05656  |
| dh                         | -1.2546  | 1.1268         | 2873 | -1.11   | 0.2656  | 0.05  | -3.4639  | 0.9548   |
| prev_CON                   | 0.2653   | 0.01969        | 2849 | 13.47   | <.0001  | 0.05  | 0.2267   | 0.3039   |
| we                         | -9.0525  | 2.2708         | 1628 | -3.99   | <.0001  | 0.05  | -13.5065 | -4.5986  |
| p_lone_cw                  | -0.1441  | 0.06649        | 3251 | -2.17   | 0.0303  | 0.05  | -0.2745  | -0.01373 |
| p_aff_cw                   | -0.1080  | 0.03606        | 2953 | -2.99   | 0.0028  | 0.05  | -0.1787  | -0.03728 |
| prev_CON*p_lone_cw         | -0.00256 | 0.000913       | 3312 | -2.80   | 0.0051  | 0.05  | -0.00435 | -0.00077 |
| prev_CON*we                | 0.1910   | 0.03346        | 2119 | 5.71    | <.0001  | 0.05  | 0.1254   | 0.2567   |
| p_lone_cw*p_lone_cw        | 0.003077 | 0.001239       | 3241 | 2.48    | 0.0130  | 0.05  | 0.000648 | 0.005505 |
| p_lone_cb                  | 0.01863  | 0.1271         | 58.1 | 0.15    | 0.8840  | 0.05  | -0.2357  | 0.2730   |
| p_aff_cb                   | -0.1030  | 0.1154         | 57.8 | -0.89   | 0.3759  | 0.05  | -0.3341  | 0.1281   |

| Type 3 Tests of Fixed Effects |        |        |         |        |
|-------------------------------|--------|--------|---------|--------|
| Effect                        | Num DF | Den DF | F Value | Pr > F |
| tp                            | 1      | 914    | 0.15    | 0.6975 |
| dh                            | 1      | 2873   | 1.24    | 0.2656 |
| prev_CON                      | 1      | 2849   | 181.52  | <.0001 |
| we                            | 1      | 1628   | 15.89   | <.0001 |
| p_lone_cw                     | 1      | 3251   | 4.70    | 0.0303 |
| p_aff_cw                      | 1      | 2953   | 8.97    | 0.0028 |
| prev_CON*p_lone_cw            | 1      | 3312   | 7.85    | 0.0051 |
| prev_CON*we                   | 1      | 2119   | 32.59   | <.0001 |
| p_lone_cw*p_lone_cw           | 1      | 3241   | 6.17    | 0.0130 |
| p_lone_cb                     | 1      | 58.1   | 0.02    | 0.8840 |
| p_aff_cb                      | 1      | 57.8   | 0.80    | 0.3759 |

## The Mixed Procedure

## Model Step 3 - ML

| Model Information         |                             |
|---------------------------|-----------------------------|
| Data Set                  | CONSTUDY.PLOS_ONE           |
| Dependent Variable        | CON                         |
| Covariance Structures     | Unstructured, Spatial Power |
| Subject Effects           | ID, ID                      |
| Estimation Method         | ML                          |
| Residual Variance Method  | Profile                     |
| Fixed Effects SE Method   | Kenward-Roger               |
| Degrees of Freedom Method | Kenward-Roger               |

| Dimensions               |    |
|--------------------------|----|
| Covariance Parameters    | 3  |
| Columns in X             | 16 |
| Columns in Z per Subject | 1  |
| Subjects                 | 65 |
| Max Obs per Subject      | 61 |

| Number of Observations |
|------------------------|
|------------------------|

| Number of Observations          |      |
|---------------------------------|------|
| Number of Observations Read     | 3341 |
| Number of Observations Used     | 3341 |
| Number of Observations Not Used | 0    |

| Iteration History |             |                |            |
|-------------------|-------------|----------------|------------|
| Iteration         | Evaluations | -2 Log Like    | Criterion  |
| 0                 | 1           | 32426.34887950 |            |
| 1                 | 2           | 32727.24593260 | 0.01199442 |
| 2                 | 3           | 32556.40947014 | .          |
| 3                 | 1           | 32390.27664526 | 0.00235525 |
| 4                 | 1           | 32354.20784352 | 0.00027982 |
| 5                 | 1           | 32350.06181208 | 0.00001673 |
| 6                 | 1           | 32349.83083717 | 0.00000013 |
| 7                 | 1           | 32349.82915123 | 0.00000000 |

Convergence criteria met.

| Covariance Parameter Estimates |         |          |                |         |        |       |         |         |
|--------------------------------|---------|----------|----------------|---------|--------|-------|---------|---------|
| Cov Parm                       | Subject | Estimate | Standard Error | Z Value | Pr Z   | Alpha | Lower   | Upper   |
| UN(1,1)                        | ID      | 50.7619  | 12.8721        | 3.94    | <.0001 | 0.05  | 32.6474 | 89.6255 |
| SP(POW)                        | ID      | 0.2171   | 0.06443        | 3.37    | 0.0008 | 0.05  | 0.09083 | 0.3434  |
| Residual                       |         | 918.45   | 22.8279        | 40.23   | <.0001 | 0.05  | 875.30  | 964.89  |

| Fit Statistics           |         |
|--------------------------|---------|
| -2 Log Likelihood        | 32349.8 |
| AIC (Smaller is Better)  | 32387.8 |
| AICC (Smaller is Better) | 32388.1 |
| BIC (Smaller is Better)  | 32429.1 |

| Null Model Likelihood Ratio Test |            |            |
|----------------------------------|------------|------------|
| DF                               | Chi-Square | Pr > ChiSq |
| 2                                | 76.52      | <.0001     |

| Solution for Fixed Effects |          |                |      |         |         |       |          |          |
|----------------------------|----------|----------------|------|---------|---------|-------|----------|----------|
| Effect                     | Estimate | Standard Error | DF   | t Value | Pr >  t | Alpha | Lower    | Upper    |
| Intercept                  | 42.5986  | 2.0008         | 326  | 21.29   | <.0001  | 0.05  | 38.6625  | 46.5347  |
| tp                         | -0.01671 | 0.03593        | 911  | -0.47   | 0.6419  | 0.05  | -0.08722 | 0.05379  |
| dh                         | -1.2048  | 1.1260         | 2868 | -1.07   | 0.2847  | 0.05  | -3.4127  | 1.0031   |
| prev_CON                   | 0.2641   | 0.01970        | 2853 | 13.41   | <.0001  | 0.05  | 0.2255   | 0.3028   |
| we                         | -9.0266  | 2.2688         | 1623 | -3.98   | <.0001  | 0.05  | -13.4768 | -4.5764  |
| p_lone_cw                  | -0.1424  | 0.06642        | 3253 | -2.14   | 0.0321  | 0.05  | -0.2727  | -0.01222 |
| p_aff_cw                   | -0.1088  | 0.03606        | 2952 | -3.02   | 0.0026  | 0.05  | -0.1795  | -0.03806 |
| prev_CON*p_lone_cw         | -0.00255 | 0.000912       | 3321 | -2.80   | 0.0052  | 0.05  | -0.00434 | -0.00076 |
| prev_CON*we                | 0.1906   | 0.03342        | 2114 | 5.70    | <.0001  | 0.05  | 0.1251   | 0.2562   |
| p_lone_cw*p_lone_cw        | 0.002960 | 0.001236       | 3219 | 2.40    | 0.0167  | 0.05  | 0.000537 | 0.005382 |
| p_lone_cb                  | 0.1620   | 0.1209         | 57.9 | 1.34    | 0.1855  | 0.05  | -0.08002 | 0.4041   |
| p_aff_cb                   | -0.3389  | 0.1251         | 57.9 | -2.71   | 0.0089  | 0.05  | -0.5893  | -0.08846 |
| Gender                     | -3.6274  | 2.9711         | 59.1 | -1.22   | 0.2270  | 0.05  | -9.5723  | 2.3175   |
| c_Age                      | -0.3492  | 0.3482         | 57.5 | -1.00   | 0.3201  | 0.05  | -1.0463  | 0.3478   |
| c_MEF                      | -0.2092  | 0.06447        | 59.6 | -3.24   | 0.0019  | 0.05  | -0.3381  | -0.08020 |
| c_phq_9                    | 0.6841   | 0.3470         | 57.8 | 1.97    | 0.0535  | 0.05  | -0.01066 | 1.3788   |

| Type 3 Tests of Fixed Effects |        |        |         |        |
|-------------------------------|--------|--------|---------|--------|
| Effect                        | Num DF | Den DF | F Value | Pr > F |
| tp                            | 1      | 911    | 0.22    | 0.6419 |
| dh                            | 1      | 2868   | 1.14    | 0.2847 |
| prev_CON                      | 1      | 2853   | 179.82  | <.0001 |
| we                            | 1      | 1623   | 15.83   | <.0001 |
| p_lone_cw                     | 1      | 3253   | 4.60    | 0.0321 |
| p_aff_cw                      | 1      | 2952   | 9.10    | 0.0026 |
| prev_CON*p_lone_cw            | 1      | 3321   | 7.83    | 0.0052 |
| prev_CON*we                   | 1      | 2114   | 32.52   | <.0001 |
| p_lone_cw*p_lone_cw           | 1      | 3219   | 5.74    | 0.0167 |
| p_lone_cb                     | 1      | 57.9   | 1.80    | 0.1855 |
| p_aff_cb                      | 1      | 57.9   | 7.34    | 0.0089 |
| Gender                        | 1      | 59.1   | 1.49    | 0.2270 |
| c_Age                         | 1      | 57.5   | 1.01    | 0.3201 |
| c_MEF                         | 1      | 59.6   | 10.53   | 0.0019 |
| c_phq_9                       | 1      | 57.8   | 3.89    | 0.0535 |

### The Mixed Procedure

## Model Step 3 - REML

| Model Information         |                             |
|---------------------------|-----------------------------|
| Data Set                  | CONSTUDY.PLOS_ONE           |
| Dependent Variable        | CON                         |
| Covariance Structures     | Unstructured, Spatial Power |
| Subject Effects           | ID, ID                      |
| Estimation Method         | REML                        |
| Residual Variance Method  | Profile                     |
| Fixed Effects SE Method   | Kenward-Roger               |
| Degrees of Freedom Method | Kenward-Roger               |

| Dimensions               |    |
|--------------------------|----|
| Covariance Parameters    | 3  |
| Columns in X             | 16 |
| Columns in Z per Subject | 1  |
| Subjects                 | 65 |
| Max Obs per Subject      | 61 |

| Number of Observations          |      |
|---------------------------------|------|
| Number of Observations Read     | 3341 |
| Number of Observations Used     | 3341 |
| Number of Observations Not Used | 0    |

| Iteration History |             |                 |            |
|-------------------|-------------|-----------------|------------|
| Iteration         | Evaluations | -2 Res Log Like | Criterion  |
| 0                 | 1           | 32485.48142751  |            |
| 1                 | 2           | 32764.99218939  | 0.01171470 |
| 2                 | 3           | 32598.02280683  | .          |
| 3                 | 1           | 32436.06164236  | 0.00208366 |
| 4                 | 1           | 32403.90671714  | 0.00028855 |
| 5                 | 1           | 32399.52499278  | 0.00002886 |
| 6                 | 1           | 32399.10861602  | 0.00000090 |
| 7                 | 1           | 32399.09652326  | 0.00000000 |

Convergence criteria met.

| Covariance Parameter Estimates |         |          |                |         |        |       |         |        |
|--------------------------------|---------|----------|----------------|---------|--------|-------|---------|--------|
| Cov Parm                       | Subject | Estimate | Standard Error | Z Value | Pr Z   | Alpha | Lower   | Upper  |
| UN(1,1)                        | ID      | 60.3534  | 15.4674        | 3.90    | <.0001 | 0.05  | 38.6546 | 107.30 |
| SP(POW)                        | ID      | 0.2310   | 0.06247        | 3.70    | 0.0002 | 0.05  | 0.1085  | 0.3534 |
| Residual                       |         | 921.40   | 22.9753        | 40.10   | <.0001 | 0.05  | 877.98  | 968.15 |

| Fit Statistics           |         |
|--------------------------|---------|
| -2 Res Log Likelihood    | 32399.1 |
| AIC (Smaller is Better)  | 32405.1 |
| AICC (Smaller is Better) | 32405.1 |
| BIC (Smaller is Better)  | 32411.6 |

| Null Model Likelihood Ratio Test |            |            |
|----------------------------------|------------|------------|
| DF                               | Chi-Square | Pr > ChiSq |
| 2                                | 86.38      | <.0001     |

| Solution for Fixed Effects |          |                |      |         |         |       |          |          |
|----------------------------|----------|----------------|------|---------|---------|-------|----------|----------|
| Effect                     | Estimate | Standard Error | DF   | t Value | Pr >  t | Alpha | Lower    | Upper    |
| Intercept                  | 42.9264  | 2.0596         | 264  | 20.84   | <.0001  | 0.05  | 38.8711  | 46.9817  |
| tp                         | -0.01621 | 0.03615        | 866  | -0.45   | 0.6540  | 0.05  | -0.08717 | 0.05475  |
| dh                         | -1.1986  | 1.1296         | 2851 | -1.06   | 0.2887  | 0.05  | -3.4135  | 1.0163   |
| prev_CON                   | 0.2578   | 0.01977        | 2836 | 13.03   | <.0001  | 0.05  | 0.2190   | 0.2965   |
| we                         | -8.9837  | 2.2800         | 1572 | -3.94   | <.0001  | 0.05  | -13.4558 | -4.5116  |
| p_lone_cw                  | -0.1443  | 0.06658        | 3238 | -2.17   | 0.0302  | 0.05  | -0.2749  | -0.01379 |
| p_aff_cw                   | -0.1097  | 0.03614        | 2933 | -3.03   | 0.0024  | 0.05  | -0.1805  | -0.03879 |
| prev_CON*p_lone_cw         | -0.00256 | 0.000913       | 3305 | -2.80   | 0.0051  | 0.05  | -0.00435 | -0.00077 |
| prev_CON*we                | 0.1906   | 0.03357        | 2071 | 5.68    | <.0001  | 0.05  | 0.1248   | 0.2564   |
| p_lone_cw*p_lone_cw        | 0.002986 | 0.001240       | 3213 | 2.41    | 0.0161  | 0.05  | 0.000554 | 0.005417 |
| p_lone_cb                  | 0.1621   | 0.1291         | 52.3 | 1.25    | 0.2151  | 0.05  | -0.09703 | 0.4211   |
| p_aff_cb                   | -0.3411  | 0.1336         | 52.3 | -2.55   | 0.0136  | 0.05  | -0.6092  | -0.07306 |
| Gender                     | -3.6638  | 3.1708         | 53.3 | -1.16   | 0.2530  | 0.05  | -10.0228 | 2.6952   |
| c_Age                      | -0.3478  | 0.3719         | 52   | -0.94   | 0.3540  | 0.05  | -1.0941  | 0.3984   |
| c_MEF                      | -0.2108  | 0.06878        | 53.6 | -3.06   | 0.0034  | 0.05  | -0.3487  | -0.07288 |
| c_phq_9                    | 0.6911   | 0.3706         | 52.2 | 1.86    | 0.0679  | 0.05  | -0.05258 | 1.4348   |

| Type 3 Tests of Fixed Effects |        |        |         |        |
|-------------------------------|--------|--------|---------|--------|
| Effect                        | Num DF | Den DF | F Value | Pr > F |
| tp                            | 1      | 866    | 0.20    | 0.6540 |
| dh                            | 1      | 2851   | 1.13    | 0.2887 |
| prev_CON                      | 1      | 2836   | 169.91  | <.0001 |
| we                            | 1      | 1572   | 15.53   | <.0001 |
| p_lone_cw                     | 1      | 3238   | 4.70    | 0.0302 |
| p_aff_cw                      | 1      | 2933   | 9.21    | 0.0024 |
| prev_CON*p_lone_cw            | 1      | 3305   | 7.85    | 0.0051 |
| prev_CON*we                   | 1      | 2071   | 32.23   | <.0001 |
| p_lone_cw*p_lone_cw           | 1      | 3213   | 5.80    | 0.0161 |
| p_lone_cb                     | 1      | 52.3   | 1.57    | 0.2151 |
| p_aff_cb                      | 1      | 52.3   | 6.52    | 0.0136 |
| Gender                        | 1      | 53.3   | 1.34    | 0.2530 |
| c_Age                         | 1      | 52     | 0.87    | 0.3540 |
| c_MEF                         | 1      | 53.6   | 9.39    | 0.0034 |
| c_phq_9                       | 1      | 52.2   | 3.48    | 0.0679 |

| Model Information         |                             |
|---------------------------|-----------------------------|
| Data Set                  | CONSTUDY.PLOS_ONE           |
| Dependent Variable        | CON                         |
| Covariance Structures     | Unstructured, Spatial Power |
| Subject Effects           | ID, ID                      |
| Estimation Method         | ML                          |
| Residual Variance Method  | Profile                     |
| Fixed Effects SE Method   | Kenward-Roger               |
| Degrees of Freedom Method | Kenward-Roger               |

| Dimensions               |    |
|--------------------------|----|
| Covariance Parameters    | 12 |
| Columns in X             | 16 |
| Columns in Z per Subject | 4  |
| Subjects                 | 65 |
| Max Obs per Subject      | 61 |

| Number of Observations          |      |
|---------------------------------|------|
| Number of Observations Read     | 3341 |
| Number of Observations Used     | 3341 |
| Number of Observations Not Used | 0    |

| Iteration History |             |                |              |
|-------------------|-------------|----------------|--------------|
| Iteration         | Evaluations | -2 Log Like    | Criterion    |
| 0                 | 1           | 32426.34887950 |              |
| 1                 | 3           | 33043.44074779 | 10050.758603 |
| 2                 | 1           | 33036.86774479 | 6167.7738975 |
| 3                 | 1           | 32984.78310326 | 1491.1438261 |
| 4                 | 1           | 32776.91059755 | 0.01493957   |
| 5                 | 3           | 32578.05067063 | .            |
| 6                 | 1           | 32427.75781793 | .            |
| 7                 | 3           | 32340.53918414 | .            |
| 8                 | 1           | 32326.88021105 | .            |
| 9                 | 1           | 32316.89980826 | 0.00016475   |
| 10                | 1           | 32314.32208527 | 0.00002557   |
| 11                | 1           | 32313.95023617 | 0.00000096   |
| 12                | 1           | 32313.93734134 | 0.00000000   |

Convergence criteria met.

| Covariance Parameter Estimates |         |          |                |         |        |       |          |         |
|--------------------------------|---------|----------|----------------|---------|--------|-------|----------|---------|
| Cov Parm                       | Subject | Estimate | Standard Error | Z Value | Pr Z   | Alpha | Lower    | Upper   |
| UN(1,1)                        | ID      | 76.9250  | 24.3319        | 3.16    | 0.0008 | 0.05  | 45.0202  | 160.45  |
| UN(2,1)                        | ID      | -21.5149 | 17.4161        | -1.24   | 0.2167 | 0.05  | -55.6499 | 12.6200 |
| UN(2,2)                        | ID      | 32.9677  | 19.8778        | 1.66    | 0.0486 | 0.05  | 13.2862  | 176.37  |
| UN(3,1)                        | ID      | -21.6863 | 20.4998        | -1.06   | 0.2901 | 0.05  | -61.8653 | 18.4926 |
| UN(3,2)                        | ID      | -4.1931  | 16.6605        | -0.25   | 0.8013 | 0.05  | -36.8471 | 28.4609 |
| UN(3,3)                        | ID      | 73.5493  | 32.4017        | 2.27    | 0.0116 | 0.05  | 36.2234  | 221.73  |
| UN(4,1)                        | ID      | 0.3184   | 0.5383         | 0.59    | 0.5542 | 0.05  | -0.7366  | 1.3735  |
| UN(4,2)                        | ID      | -0.03406 | 0.4934         | -0.07   | 0.9450 | 0.05  | -1.0012  | 0.9330  |

| Covariance Parameter Estimates |         |          |                |         |        |       |         |        |
|--------------------------------|---------|----------|----------------|---------|--------|-------|---------|--------|
| Cov Parm                       | Subject | Estimate | Standard Error | Z Value | Pr Z   | Alpha | Lower   | Upper  |
| UN(4,3)                        | ID      | 0.7033   | 0.6100         | 1.15    | 0.2489 | 0.05  | -0.4922 | 1.8988 |
| UN(4,4)                        | ID      | 0.05799  | 0.02258        | 2.57    | 0.0051 | 0.05  | 0.03059 | 0.1492 |
| SP(POW)                        | ID      | 0.2300   | 0.06472        | 3.55    | 0.0004 | 0.05  | 0.1032  | 0.3569 |
| Residual                       |         | 881.88   | 22.6647        | 38.91   | <.0001 | 0.05  | 839.09  | 928.04 |

| Fit Statistics           |         |
|--------------------------|---------|
| -2 Log Likelihood        | 32313.9 |
| AIC (Smaller is Better)  | 32369.9 |
| AICC (Smaller is Better) | 32370.4 |
| BIC (Smaller is Better)  | 32430.8 |

| Null Model Likelihood Ratio Test |            |            |
|----------------------------------|------------|------------|
| DF                               | Chi-Square | Pr > ChiSq |
| 11                               | 112.41     | <.0001     |

| Solution for Fixed Effects |          |                |      |         |         |       |          |          |
|----------------------------|----------|----------------|------|---------|---------|-------|----------|----------|
| Effect                     | Estimate | Standard Error | DF   | t Value | Pr >  t | Alpha | Lower    | Upper    |
| Intercept                  | 43.4865  | 2.1344         | 198  | 20.37   | <.0001  | 0.05  | 39.2775  | 47.6956  |
| tp                         | -0.02175 | 0.03659        | 832  | -0.59   | 0.5525  | 0.05  | -0.09358 | 0.05008  |
| dh                         | -1.2082  | 1.3291         | 63.9 | -0.91   | 0.3667  | 0.05  | -3.8634  | 1.4470   |
| prev_CON                   | 0.2502   | 0.01993        | 2788 | 12.55   | <.0001  | 0.05  | 0.2111   | 0.2893   |
| we                         | -6.3796  | 2.6195         | 201  | -2.44   | 0.0157  | 0.05  | -11.5449 | -1.2143  |
| p_lone_cw                  | -0.1368  | 0.07704        | 283  | -1.78   | 0.0769  | 0.05  | -0.2884  | 0.01487  |
| p_aff_cw                   | -0.1186  | 0.03638        | 2952 | -3.26   | 0.0011  | 0.05  | -0.1900  | -0.04732 |
| prev_CON*p_lone_cw         | -0.00282 | 0.000965       | 2238 | -2.92   | 0.0035  | 0.05  | -0.00471 | -0.00093 |
| prev_CON*we                | 0.1528   | 0.03553        | 1066 | 4.30    | <.0001  | 0.05  | 0.08312  | 0.2225   |
| p_lone_cw*p_lone_cw        | 0.002932 | 0.001368       | 1199 | 2.14    | 0.0323  | 0.05  | 0.000248 | 0.005615 |
| p_lone_cb                  | 0.1232   | 0.1308         | 56.5 | 0.94    | 0.3504  | 0.05  | -0.1388  | 0.3851   |
| p_aff_cb                   | -0.3370  | 0.1347         | 55.4 | -2.50   | 0.0153  | 0.05  | -0.6068  | -0.06709 |
| Gender                     | -4.1804  | 3.1849         | 56.6 | -1.31   | 0.1946  | 0.05  | -10.5590 | 2.1981   |
| c_Age                      | -0.2192  | 0.3738         | 56.5 | -0.59   | 0.5598  | 0.05  | -0.9678  | 0.5293   |
| c_MEF                      | -0.2255  | 0.06925        | 57   | -3.26   | 0.0019  | 0.05  | -0.3642  | -0.08684 |
| c_phq_9                    | 0.7282   | 0.3735         | 55.2 | 1.95    | 0.0563  | 0.05  | -0.02018 | 1.4767   |

| Type 3 Tests of Fixed Effects |        |        |         |        |
|-------------------------------|--------|--------|---------|--------|
| Effect                        | Num DF | Den DF | F Value | Pr > F |
| tp                            | 1      | 832    | 0.35    | 0.5525 |
| dh                            | 1      | 63.9   | 0.83    | 0.3667 |
| prev_CON                      | 1      | 2788   | 157.48  | <.0001 |
| we                            | 1      | 201    | 5.93    | 0.0157 |
| p_lone_cw                     | 1      | 283    | 3.15    | 0.0769 |
| p_aff_cw                      | 1      | 2952   | 10.64   | 0.0011 |
| prev_CON*p_lone_cw            | 1      | 2238   | 8.54    | 0.0035 |
| prev_CON*we                   | 1      | 1066   | 18.50   | <.0001 |
| p_lone_cw*p_lone_cw           | 1      | 1199   | 4.59    | 0.0323 |
| p_lone_cb                     | 1      | 56.5   | 0.89    | 0.3504 |
| p_aff_cb                      | 1      | 55.4   | 6.26    | 0.0153 |
| Gender                        | 1      | 56.6   | 1.72    | 0.1946 |
| c_Age                         | 1      | 56.5   | 0.34    | 0.5598 |
| c_MEF                         | 1      | 57     | 10.60   | 0.0019 |
| c_phq_9                       | 1      | 55.2   | 3.80    | 0.0563 |



| Model Information         |                             |
|---------------------------|-----------------------------|
| Data Set                  | CONSTUDY.PLOS_ONE           |
| Dependent Variable        | CON                         |
| Covariance Structures     | Unstructured, Spatial Power |
| Subject Effects           | ID, ID                      |
| Estimation Method         | REML                        |
| Residual Variance Method  | Profile                     |
| Fixed Effects SE Method   | Kenward-Roger               |
| Degrees of Freedom Method | Kenward-Roger               |

| Dimensions               |    |
|--------------------------|----|
| Covariance Parameters    | 12 |
| Columns in X             | 16 |
| Columns in Z per Subject | 4  |
| Subjects                 | 65 |
| Max Obs per Subject      | 61 |

| Number of Observations          |      |
|---------------------------------|------|
| Number of Observations Read     | 3341 |
| Number of Observations Used     | 3341 |
| Number of Observations Not Used | 0    |

| Iteration History |             |                 |              |
|-------------------|-------------|-----------------|--------------|
| Iteration         | Evaluations | -2 Res Log Like | Criterion    |
| 0                 | 1           | 32485.48142751  |              |
| 1                 | 3           | 33079.83850140  | 53118.952869 |
| 2                 | 1           | 33073.64206614  | 6266.8244846 |
| 3                 | 1           | 33019.99864493  | 1526.9400078 |
| 4                 | 1           | 32810.15820776  | 0.01471333   |
| 5                 | 3           | 32626.51483240  | .            |
| 6                 | 1           | 32473.13765540  | .            |
| 7                 | 3           | 32391.08067120  | .            |
| 8                 | 1           | 32375.98443294  | .            |
| 9                 | 1           | 32364.68581062  | 0.00020329   |
| 10                | 1           | 32361.47155447  | 0.00003572   |
| 11                | 1           | 32360.94380920  | 0.00000178   |
| 12                | 1           | 32360.91957170  | 0.00000001   |

Convergence criteria met.

| Covariance Parameter Estimates |         |          |                |         |        |       |          |         |
|--------------------------------|---------|----------|----------------|---------|--------|-------|----------|---------|
| Cov Parm                       | Subject | Estimate | Standard Error | Z Value | Pr Z   | Alpha | Lower    | Upper   |
| UN(1,1)                        | ID      | 86.7145  | 26.8376        | 3.23    | 0.0006 | 0.05  | 51.2594  | 177.52  |
| UN(2,1)                        | ID      | -21.5890 | 18.1971        | -1.19   | 0.2355 | 0.05  | -57.2545 | 14.0766 |
| UN(2,2)                        | ID      | 33.9044  | 20.2810        | 1.67    | 0.0473 | 0.05  | 13.7394  | 178.05  |
| UN(3,1)                        | ID      | -21.9663 | 21.9288        | -1.00   | 0.3165 | 0.05  | -64.9459 | 21.0133 |
| UN(3,2)                        | ID      | -4.6339  | 17.2846        | -0.27   | 0.7886 | 0.05  | -38.5110 | 29.2432 |
| UN(3,3)                        | ID      | 80.1433  | 34.0478        | 2.35    | 0.0093 | 0.05  | 40.3019  | 229.91  |
| UN(4,1)                        | ID      | 0.3206   | 0.5755         | 0.56    | 0.5775 | 0.05  | -0.8073  | 1.4485  |
| UN(4,2)                        | ID      | -0.03897 | 0.5079         | -0.08   | 0.9388 | 0.05  | -1.0344  | 0.9565  |

| Covariance Parameter Estimates |         |          |                |         |        |       |         |        |
|--------------------------------|---------|----------|----------------|---------|--------|-------|---------|--------|
| Cov Parm                       | Subject | Estimate | Standard Error | Z Value | Pr Z   | Alpha | Lower   | Upper  |
| UN(4,3)                        | ID      | 0.7250   | 0.6391         | 1.13    | 0.2566 | 0.05  | -0.5277 | 1.9777 |
| UN(4,4)                        | ID      | 0.06175  | 0.02362        | 2.61    | 0.0045 | 0.05  | 0.03289 | 0.1556 |
| SP(POW)                        | ID      | 0.2452   | 0.06246        | 3.92    | <.0001 | 0.05  | 0.1227  | 0.3676 |
| Residual                       |         | 883.59   | 22.7710        | 38.80   | <.0001 | 0.05  | 840.61  | 929.98 |

| Fit Statistics           |         |
|--------------------------|---------|
| -2 Res Log Likelihood    | 32360.9 |
| AIC (Smaller is Better)  | 32384.9 |
| AICC (Smaller is Better) | 32385.0 |
| BIC (Smaller is Better)  | 32411.0 |

| Null Model Likelihood Ratio Test |            |            |
|----------------------------------|------------|------------|
| DF                               | Chi-Square | Pr > ChiSq |
| 11                               | 124.56     | <.0001     |

| Solution for Fixed Effects |          |                |      |         |         |       |          |          |
|----------------------------|----------|----------------|------|---------|---------|-------|----------|----------|
| Effect                     | Estimate | Standard Error | DF   | t Value | Pr >  t | Alpha | Lower    | Upper    |
| Intercept                  | 43.8595  | 2.1938         | 175  | 19.99   | <.0001  | 0.05  | 39.5296  | 48.1893  |
| tp                         | -0.02141 | 0.03686        | 796  | -0.58   | 0.5614  | 0.05  | -0.09377 | 0.05094  |
| dh                         | -1.2002  | 1.3370         | 62.9 | -0.90   | 0.3728  | 0.05  | -3.8721  | 1.4716   |
| prev_CON                   | 0.2431   | 0.02000        | 2796 | 12.15   | <.0001  | 0.05  | 0.2039   | 0.2824   |
| we                         | -6.0989  | 2.6536         | 198  | -2.30   | 0.0226  | 0.05  | -11.3320 | -0.8659  |
| p_lone_cw                  | -0.1400  | 0.07768        | 274  | -1.80   | 0.0726  | 0.05  | -0.2929  | 0.01294  |
| p_aff_cw                   | -0.1202  | 0.03647        | 2952 | -3.30   | 0.0010  | 0.05  | -0.1917  | -0.04869 |
| prev_CON*p_lone_cw         | -0.00281 | 0.000967       | 2260 | -2.91   | 0.0037  | 0.05  | -0.00471 | -0.00092 |
| prev_CON*we                | 0.1490   | 0.03577        | 1122 | 4.16    | <.0001  | 0.05  | 0.07878  | 0.2191   |
| p_lone_cw*p_lone_cw        | 0.002950 | 0.001374       | 1233 | 2.15    | 0.0320  | 0.05  | 0.000254 | 0.005646 |
| p_lone_cb                  | 0.1267   | 0.1401         | 51.3 | 0.90    | 0.3698  | 0.05  | -0.1544  | 0.4079   |
| p_aff_cb                   | -0.3394  | 0.1443         | 50.4 | -2.35   | 0.0226  | 0.05  | -0.6292  | -0.04956 |
| Gender                     | -4.2398  | 3.4101         | 51.5 | -1.24   | 0.2194  | 0.05  | -11.0844 | 2.6048   |
| c_Age                      | -0.2278  | 0.4002         | 51.2 | -0.57   | 0.5717  | 0.05  | -1.0312  | 0.5755   |
| c_MEF                      | -0.2263  | 0.07412        | 51.8 | -3.05   | 0.0036  | 0.05  | -0.3750  | -0.07753 |
| c_phq_9                    | 0.7361   | 0.4002         | 50.3 | 1.84    | 0.0718  | 0.05  | -0.06759 | 1.5399   |

| Type 3 Tests of Fixed Effects |        |        |         |        |
|-------------------------------|--------|--------|---------|--------|
| Effect                        | Num DF | Den DF | F Value | Pr > F |
| tp                            | 1      | 796    | 0.34    | 0.5614 |
| dh                            | 1      | 62.9   | 0.81    | 0.3728 |
| prev_CON                      | 1      | 2796   | 147.72  | <.0001 |
| we                            | 1      | 198    | 5.28    | 0.0226 |
| p_lone_cw                     | 1      | 274    | 3.25    | 0.0726 |
| p_aff_cw                      | 1      | 2952   | 10.86   | 0.0010 |
| prev_CON*p_lone_cw            | 1      | 2260   | 8.46    | 0.0037 |
| prev_CON*we                   | 1      | 1122   | 17.34   | <.0001 |
| p_lone_cw*p_lone_cw           | 1      | 1233   | 4.61    | 0.0320 |
| p_lone_cb                     | 1      | 51.3   | 0.82    | 0.3698 |
| p_aff_cb                      | 1      | 50.4   | 5.53    | 0.0226 |
| Gender                        | 1      | 51.5   | 1.55    | 0.2194 |
| c_Age                         | 1      | 51.2   | 0.32    | 0.5717 |
| c_MEF                         | 1      | 51.8   | 9.32    | 0.0036 |
| c_phq_9                       | 1      | 50.3   | 3.38    | 0.0718 |

| Model Information         |                             |
|---------------------------|-----------------------------|
| Data Set                  | CONSTUDY.PLOS_ONE           |
| Dependent Variable        | CON                         |
| Covariance Structures     | Unstructured, Spatial Power |
| Subject Effects           | ID, ID                      |
| Estimation Method         | ML                          |
| Residual Variance Method  | Profile                     |
| Fixed Effects SE Method   | Kenward-Roger               |
| Degrees of Freedom Method | Kenward-Roger               |

| Dimensions               |    |
|--------------------------|----|
| Covariance Parameters    | 12 |
| Columns in X             | 22 |
| Columns in Z per Subject | 4  |
| Subjects                 | 65 |
| Max Obs per Subject      | 61 |

| Number of Observations          |      |
|---------------------------------|------|
| Number of Observations Read     | 3341 |
| Number of Observations Used     | 3341 |
| Number of Observations Not Used | 0    |

| Iteration History |             |                |              |
|-------------------|-------------|----------------|--------------|
| Iteration         | Evaluations | -2 Log Like    | Criterion    |
| 0                 | 1           | 32415.35797714 |              |
| 1                 | 2           | 33034.63866570 | 4985.6805084 |
| 2                 | 1           | 33028.78305850 | 40986.308628 |
| 3                 | 1           | 32991.84748536 | 6382.6341595 |
| 4                 | 1           | 32808.65852650 | 0.01611899   |
| 5                 | 3           | 32680.45091313 | .            |
| 6                 | 1           | 32480.07852334 | .            |
| 7                 | 1           | 32376.04440666 | .            |
| 8                 | 2           | 32324.30081879 | .            |
| 9                 | 1           | 32307.83547905 | 0.00015914   |
| 10                | 1           | 32305.46949121 | 0.00001089   |
| 11                | 1           | 32305.31824316 | 0.00000012   |
| 12                | 1           | 32305.31666531 | 0.00000000   |

Convergence criteria met.

| Covariance Parameter Estimates |         |          |                |         |        |       |          |         |
|--------------------------------|---------|----------|----------------|---------|--------|-------|----------|---------|
| Cov Parm                       | Subject | Estimate | Standard Error | Z Value | Pr Z   | Alpha | Lower    | Upper   |
| UN(1,1)                        | ID      | 74.3509  | 23.6009        | 3.15    | 0.0008 | 0.05  | 43.4425  | 155.56  |
| UN(2,1)                        | ID      | -19.6023 | 17.0338        | -1.15   | 0.2498 | 0.05  | -52.9880 | 13.7833 |
| UN(2,2)                        | ID      | 31.0190  | 19.5485        | 1.59    | 0.0563 | 0.05  | 12.1169  | 184.90  |
| UN(3,1)                        | ID      | -20.1880 | 20.2285        | -1.00   | 0.3183 | 0.05  | -59.8351 | 19.4591 |
| UN(3,2)                        | ID      | -3.9185  | 16.4887        | -0.24   | 0.8122 | 0.05  | -36.2357 | 28.3987 |
| UN(3,3)                        | ID      | 72.4351  | 32.1826        | 2.25    | 0.0122 | 0.05  | 35.4989  | 221.00  |
| UN(4,1)                        | ID      | -0.00511 | 0.5275         | -0.01   | 0.9923 | 0.05  | -1.0390  | 1.0288  |
| UN(4,2)                        | ID      | -0.05809 | 0.4768         | -0.12   | 0.9030 | 0.05  | -0.9926  | 0.8764  |

| Covariance Parameter Estimates |         |          |                |         |        |       |         |        |
|--------------------------------|---------|----------|----------------|---------|--------|-------|---------|--------|
| Cov Parm                       | Subject | Estimate | Standard Error | Z Value | Pr Z   | Alpha | Lower   | Upper  |
| UN(4,3)                        | ID      | 1.3384   | 0.6687         | 2.00    | 0.0453 | 0.05  | 0.02787 | 2.6490 |
| UN(4,4)                        | ID      | 0.05077  | 0.02163        | 2.35    | 0.0094 | 0.05  | 0.02549 | 0.1462 |
| SP(POW)                        | ID      | 0.2323   | 0.06446        | 3.60    | 0.0003 | 0.05  | 0.1059  | 0.3586 |
| Residual                       |         | 882.16   | 22.6987        | 38.86   | <.0001 | 0.05  | 839.31  | 928.40 |

| Fit Statistics           |         |
|--------------------------|---------|
| -2 Log Likelihood        | 32305.3 |
| AIC (Smaller is Better)  | 32373.3 |
| AICC (Smaller is Better) | 32374.0 |
| BIC (Smaller is Better)  | 32447.2 |

| Null Model Likelihood Ratio Test |            |            |
|----------------------------------|------------|------------|
| DF                               | Chi-Square | Pr > ChiSq |
| 11                               | 110.04     | <.0001     |

| Information Criteria |       |         |         |         |         |         |
|----------------------|-------|---------|---------|---------|---------|---------|
| Neg2LogLike          | Parms | AIC     | AICC    | HQIC    | BIC     | CAIC    |
| 32305.3              | 34    | 32373.3 | 32374.0 | 32402.5 | 32447.2 | 32481.2 |

| Solution for Fixed Effects |          |                |      |         |         |       |          |          |
|----------------------------|----------|----------------|------|---------|---------|-------|----------|----------|
| Effect                     | Estimate | Standard Error | DF   | t Value | Pr >  t | Alpha | Lower    | Upper    |
| Intercept                  | 43.3075  | 2.1256         | 201  | 20.37   | <.0001  | 0.05  | 39.1162  | 47.4988  |
| tp                         | -0.02082 | 0.03653        | 818  | -0.57   | 0.5689  | 0.05  | -0.09253 | 0.05089  |
| dh                         | -1.1781  | 1.3172         | 63.7 | -0.89   | 0.3745  | 0.05  | -3.8097  | 1.4535   |
| prev_CON                   | 0.2485   | 0.01995        | 2810 | 12.46   | <.0001  | 0.05  | 0.2094   | 0.2876   |
| we                         | -6.6223  | 2.6145         | 201  | -2.53   | 0.0121  | 0.05  | -11.7777 | -1.4669  |
| p_lone_cw                  | -0.1981  | 0.08502        | 279  | -2.33   | 0.0205  | 0.05  | -0.3655  | -0.03074 |
| p_aff_cw                   | -0.1205  | 0.03639        | 2938 | -3.31   | 0.0009  | 0.05  | -0.1919  | -0.04916 |
| prev_CON*p_lone_cw         | -0.00270 | 0.000969       | 2309 | -2.79   | 0.0053  | 0.05  | -0.00460 | -0.00080 |
| prev_CON*we                | 0.1559   | 0.03543        | 1048 | 4.40    | <.0001  | 0.05  | 0.08636  | 0.2254   |
| p_lone_cw*p_lone_cw        | 0.003596 | 0.001419       | 2328 | 2.53    | 0.0114  | 0.05  | 0.000813 | 0.006380 |
| p_lone_cb                  | 0.1581   | 0.1294         | 56.6 | 1.22    | 0.2270  | 0.05  | -0.1011  | 0.4173   |
| p_aff_cb                   | -0.3569  | 0.1337         | 56.3 | -2.67   | 0.0099  | 0.05  | -0.6247  | -0.08921 |
| Gender                     | -3.9048  | 3.1724         | 57.3 | -1.23   | 0.2234  | 0.05  | -10.2568 | 2.4472   |
| c_Age                      | -0.3050  | 0.3728         | 56.4 | -0.82   | 0.4168  | 0.05  | -1.0518  | 0.4418   |
| c_MEF                      | -0.2134  | 0.06880        | 57.7 | -3.10   | 0.0030  | 0.05  | -0.3512  | -0.07569 |
| c_phq_9                    | 0.7148   | 0.3712         | 56.3 | 1.93    | 0.0592  | 0.05  | -0.02866 | 1.4583   |
| p_lone_cw*c_MEF            | 0.002994 | 0.002674       | 46.7 | 1.12    | 0.2686  | 0.05  | -0.00239 | 0.008375 |
| p_lone_cw*c_phq_9          | 0.000159 | 0.01425        | 47.3 | 0.01    | 0.9912  | 0.05  | -0.02850 | 0.02882  |
| p_lone_cw*Gender           | 0.1024   | 0.1346         | 53.6 | 0.76    | 0.4500  | 0.05  | -0.1675  | 0.3724   |
| p_lone_cw*c_Age            | -0.02652 | 0.01906        | 75.5 | -1.39   | 0.1682  | 0.05  | -0.06448 | 0.01145  |
| p_lone_cw*p_aff_cb         | -0.00268 | 0.005054       | 42.3 | -0.53   | 0.5984  | 0.05  | -0.01288 | 0.007516 |
| p_lone_cw*p_lone_cb        | 0.008999 | 0.004841       | 43.2 | 1.86    | 0.0699  | 0.05  | -0.00076 | 0.01876  |

| Type 3 Tests of Fixed Effects |        |        |         |        |
|-------------------------------|--------|--------|---------|--------|
| Effect                        | Num DF | Den DF | F Value | Pr > F |
| tp                            | 1      | 818    | 0.32    | 0.5689 |
| dh                            | 1      | 63.7   | 0.80    | 0.3745 |
| prev_CON                      | 1      | 2810   | 155.15  | <.0001 |
| we                            | 1      | 201    | 6.42    | 0.0121 |
| p_lone_cw                     | 1      | 279    | 5.43    | 0.0205 |

**Type 3 Tests of Fixed Effects**

| <b>Effect</b>       | <b>Num DF</b> | <b>Den DF</b> | <b>F Value</b> | <b>Pr &gt; F</b> |
|---------------------|---------------|---------------|----------------|------------------|
| p_aff_cw            | 1             | 2938          | 10.97          | 0.0009           |
| prev_CON*p_lone_cw  | 1             | 2309          | 7.79           | 0.0053           |
| prev_CON*we         | 1             | 1048          | 19.36          | <.0001           |
| p_lone_cw*p_lone_cw | 1             | 2328          | 6.42           | 0.0114           |
| p_lone_cb           | 1             | 56.6          | 1.49           | 0.2270           |
| p_aff_cb            | 1             | 56.3          | 7.13           | 0.0099           |
| Gender              | 1             | 57.3          | 1.51           | 0.2234           |
| c_Age               | 1             | 56.4          | 0.67           | 0.4168           |
| c_MEF               | 1             | 57.7          | 9.62           | 0.0030           |
| c_phq_9             | 1             | 56.3          | 3.71           | 0.0592           |
| p_lone_cw*c_MEF     | 1             | 46.7          | 1.25           | 0.2686           |
| p_lone_cw*c_phq_9   | 1             | 47.3          | 0.00           | 0.9912           |
| p_lone_cw*Gender    | 1             | 53.6          | 0.58           | 0.4500           |
| p_lone_cw*c_Age     | 1             | 75.5          | 1.94           | 0.1682           |
| p_lone_cw*p_aff_cb  | 1             | 42.3          | 0.28           | 0.5984           |
| p_lone_cw*p_lone_cb | 1             | 43.2          | 3.46           | 0.0699           |
